# Supplementary material for: Technical Note: Review of methods for linear least-squares fitting of data and application to atmospheric chemistry problems
Source: Copernicus journal article supplement (doi:10.5194/acp-8-5477-2008), 2008-09-12
Supplement: Supplementary file 1 [file acp-8-5477-2008-supplement.zip]

# Williamson-York Iterative Bivariate Fit Shell

Chris A. Cantrell (30 June 2008)

|            |                 |                 |           |                |                 |           |             |            |         |
|------------|-----------------|-----------------|-----------|----------------|-----------------|-----------|-------------|------------|---------|
| Bivariate: | m               | -0.480533407446 | Standard: | m              | -0.539577274984 | std err m | 0.042126548 | last data: | \$B\$38 |
|            | b               | 5.479910224033  |           | b              | 5.761185190439  | std err b | 0.189485196 | No. of pts | 10      |
|            | std err m       | 0.070620269529  |           | r <sup>2</sup> | 0.95350386      | std err y | 0.316358879 |            |         |
|            | std err b       | 0.359246522551  |           | F              | 164.0572952     |           |             |            |         |
|            | Goodness of fit | 1.483294149258  |           |                |                 |           |             |            |         |

- (1) You will need "Data Analysis" add-in enabled (to use Solver); the approach is slightly different with Excel 2007
- (2) Solver options: time: 100, iterations: 10000, precision: 1E-30, tolerance: 1E-20, convergence: 1E-30, check "Use Automatic Scaling"
- (3) put x, y, variance(x) (or wx), and variance(y) (or wy) data in row 29 and below (check for other data below yours). Leave no gaps in data.
- (4) Indicate whether values of variance(x) (or wx) and variance(y) (or wy) are weights (W) or variances (S) in C25.
- (5) copy formulas in wi, wixi, wiyi, zi or  $\beta_i$ ,  $wi\beta_iVi$ ,  $wi\beta_iUi$ ,  $\beta_iwi$  &  $wi(\beta_i - \beta_{bar})^2$  for each data pair (initial setup for up to 5500 data pairs)
- (6) Select Tools/Solver and set difference (N21) to 0, by adjusting initial guess for m (M21). Can put std slope (K1) value as initial guess.
- (7) Check for errors in results screen and accept new results if ok.
- (8) Results in G1 and G2. Compare to standard least squares in K1 and K2
- (9) Test with Pearson's data with York's weights ( $m = -0.480533407446$ ,  $b = 5.479910224033$ )

initial guess    difference  
-0.4805334    0.00E+00

| No. of pts: 10 | weights or variances code |               |               |          | $\Sigma wi$ |            |            | $\Sigma wi\beta_iUi$ | $\Sigma wi\beta_iVi$ | $\Sigma wi(\beta_i - \beta\text{-bar})^2$ |             |                                                 |             |
|----------------|---------------------------|---------------|---------------|----------|-------------|------------|------------|----------------------|----------------------|-------------------------------------------|-------------|-------------------------------------------------|-------------|
|                | W                         |               |               |          | 158.61212   |            |            | -140.74687           | 292.89717            | 297.41889                                 |             |                                                 |             |
| 3.85           | 3.6                       |               |               | ← Median |             | x bar      | y bar      |                      |                      |                                           | sum S       |                                                 |             |
| 3.82           | 3.7                       | 366.28        | 79.48         | ← Mean   |             | 4.9109694  | 3.1200254  |                      |                      | -0.0117235                                | 11.86635319 |                                                 |             |
| x              | y                         | var(x) or wxi | var(y) or wyi |          | wi          | wixi       | wiyi       | zi or $\beta_i$      | wi $\beta_iUi$       | wi $\beta_iVi$                            | $\beta_iwi$ | wi( $\beta_i - \beta\text{-bar}$ ) <sup>2</sup> | S           |
| 0.0            | 5.9                       | 1000.0        | 1.0           |          | 0.99976914  | 0          | 5.89863793 | -4.9111712           | -13.649779           | 24.1130431                                | -4.9100374  | 23.9990461                                      | 0.176434679 |
| 0.9            | 5.4                       | 1000.0        | 1.8           |          | 1.79925215  | 1.61932694 | 9.71596164 | -4.0112742           | -16.455246           | 28.9483439                                | -7.2172937  | 28.7815677                                      | 0.223656928 |
| 1.8            | 4.4                       | 500.0         | 4.0           |          | 3.99262443  | 7.18672397 | 17.5675475 | -3.1101445           | -15.894263           | 38.6308947                                | -12.417639  | 38.3300456                                      | 0.184473388 |
| 2.6            | 4.6                       | 800.0         | 8.0           |          | 7.98156957  | 20.7520809 | 36.71522   | -2.3127407           | -27.319297           | 42.6588787                                | -18.459301  | 42.2598597                                      | 1.089587879 |
| 3.3            | 3.5                       | 200.0         | 20.0          |          | 19.5485987  | 64.5103757 | 68.4200955 | -1.5924566           | -11.828722           | 50.1499515                                | -31.130295  | 48.8464207                                      | 3.036957036 |
| 4.4            | 3.7                       | 80.0          | 20.0          |          | 18.9084512  | 83.1971855 | 69.9612696 | -0.5489536           | -6.0200567           | 5.30379157                                | -10.379862  | 5.45728556                                      | 2.114871553 |
| 5.2            | 2.8                       | 60.0          | 70.0          |          | 55.1442604  | 286.750154 | 154.403929 | 0.36902856           | -6.5124549           | 5.8817179                                 | 20.3498069  | 7.99437979                                      | 1.809307092 |
| 6.1            | 2.8                       | 20.0          | 70.0          |          | 38.7126764  | 236.147326 | 108.395494 | 0.95524677           | -11.83459            | 43.9705428                                | 36.9801593  | 36.1975704                                      | 2.445618588 |
| 6.5            | 2.4                       | 1.8           | 100.0         |          | 7.23146103  | 47.0044967 | 17.3555065 | 1.50494259           | -7.8359885           | 17.2933152                                | 10.8829337  | 16.6343559                                      | 0.013719569 |
| 7.4            | 1.5                       | 1.0           | 500.0         |          | 4.2934605   | 31.7716077 | 6.44019076 | 3.36373044           | -23.396478           | 35.9466897                                | 14.4420438  | 48.9183543                                      | 0.771726482 |
