# Supplementary material for: Technical Note: Review of methods for linear least-squares fitting of data and application to atmospheric chemistry problems
Source: Copernicus journal article supplement (doi:10.5194/acp-8-5477-2008), 2008-09-12
Supplement: Supplementary file 1 [file acp-2008-0073-sp1.xls]

## Sheet: bivariate fit shell
Williamson-York Iterative Bivariate Fit Shell				Bivariate:	m	-0.480533		Standard:	m	-0.539577		std err m	0.0421265		last data:	$B$38	$A$38
Chris A. Cantrell (30 June 2008)					b	5.47991			b	5.76119		std err b	0.189485		No. of pts	10
					std err m	0.0706203			r 2	0.953504		std err y	0.316359
					std err b	0.359247			F	164.057
					Goodness of fit	1.48329
	(1) You will need "Data Analysis" add-in enabled (to use Solver); the approach is slightly different with Excel 2007
	(2) Solver options: time: 100, iterations: 10000, precision: 1E-30, tolerance: 1E-20, convergence: 1E-30, check "Use Automatic Scaling"
	(3) put x, y, variance(x) (or wx), and variance(y) (or wy) data in row 29 and below (check for other data below yours). Leave no gaps in data.
	(4) Indicate whether values of variance(x) (or wx) and variance(y) (or wy) are weights (W) or variances (S) in C25.
	(5) copy formulas in wi, wixi, wiyi, zi or βi, wiβiVi, wiβiUi, βiwi & wi(βi-βbar)2 for each data pair (initial setup for up to 5500 data pairs)
	(6) Select Tools/Solver and set difference (N21) to 0, by adjusting initial guess for m (M21). Can put std slope (K1) value as initial guess.
	(7) Check for errors in results screen and accept new results if ok.
	(8) Results in G1 and G2. Compare to standard least squares in K1 and K2											initial guess	difference
	(9) Test with Pearson's data with York's weights (m=-0.480533407446, b=5.479910224033)											-0.480533	0
No. of pts: 10		weights or variances code				Σwi				SwiβiUi	SwiβiVi		Swi(βi-βbar)2
		W				158.612				-140.747	292.897		297.419
3.85	3.6			← Median			x bar	y bar				β bar			sum S
3.82	3.7	366.28	79.48	← Mean			4.91097	3.12003				-0.0117235			11.8664
x	y	var(x) or wxi	var(y) or wyi			wi	wixi	wiyi	zi or βi	wiβiUi	wiβiVi	βiwi	wi(βi-βbar)2		S
0	5.9	1000	1			0.999769	0	5.89864	-4.91117	-13.6498	24.113	-4.91004	23.999		0.176435
0.9	5.4	1000	1.8			1.79925	1.61933	9.71596	-4.01127	-16.4552	28.9483	-7.21729	28.7816		0.223657
1.8	4.4	500	4			3.99262	7.18672	17.5675	-3.11014	-15.8943	38.6309	-12.4176	38.33		0.184473
2.6	4.6	800	8			7.98157	20.7521	36.7152	-2.31274	-27.3193	42.6589	-18.4593	42.2599		1.08959
3.3	3.5	200	20			19.5486	64.5104	68.4201	-1.59246	-11.8287	50.15	-31.1303	48.8464		3.03696
4.4	3.7	80	20			18.9085	83.1972	69.9613	-0.548954	-6.02006	5.30379	-10.3799	5.45729		2.11487
5.2	2.8	60	70			55.1443	286.75	154.404	0.369029	-6.51245	5.88172	20.3498	7.99438		1.80931
6.1	2.8	20	70			38.7127	236.147	108.395	0.955247	-11.8346	43.9705	36.9802	36.1976		2.44562
6.5	2.4	1.8	100			7.23146	47.0045	17.3555	1.50494	-7.83599	17.2933	10.8829	16.6344		0.0137196
7.4	1.5	1	500			4.29346	31.7716	6.44019	3.36373	-23.3965	35.9467	14.442	48.9184		0.771726
